# Supplementary material for: Characterization of High and Low Achievers for Early Identification of Students- A single-centre Qualitative Study in the Indian Context
Source: Research Square preprint supplement (doi:10.21203/rs.3.rs-8342116/v1), 2026-01-13
Supplement: Supplementary file 1 [file 4ebe66eef42a08631b43da55.docx]

**INTERVIEW GUIDE**

**Study Title:** Characterizing High and Low Achievers for Early Identification of Struggling Students in India: A Qualitative Study

**Objective:** To examine the differences between high and low achieving students.

**1. Purpose and Overview**

This interview explores **teachers’ perceptions on characterization of high- and low-achieving students** in allied health sciences programs. The goal is to identify behavioural, academic, and contextual indicators that help in the early identification of struggling students.

**Estimated duration:** 35–40 minutes.

**2. Opening script**

Good Morning, I am **U. Monica Varshini**, conducting a study on how teachers perceive the learning characteristics between high- and low-achieving students in allied health sciences programs.

The purpose of this discussion is to explore your experiences and observations regarding student learning behaviours, performance patterns, and factors that influence academic achievement.

Your participation is completely voluntary. You may skip any question or stop the interview at any time. Everything you share will be kept confidential, and your name or identifying details will not appear in any reports.

With your permission, I would like to audio-record this interview so I can accurately capture your responses.

**Before we begin, do you have any questions?**
May I start the recording?

**3. Core Interview Questions**

**1. What common behaviours do you observe in students who perform well academically?**

**2. How do good study habits contribute to student success? What habits do struggling students usually lack?**

**3. How do high-performing students prepare for assessments and examinations compared to those who struggle?**

**4. How does student participation in theory and practical sessions influence their performance?**

**5. In your experience, how does regular class attendance affect student performance?**

**6. How do classroom atmosphere, student interactions, and teacher–student relationships influence learning outcomes?**

**7. What early signs indicate that a student might be struggling academically? How do you identify and support such students?**

**8. How important is self-motivation in determining academic success?**

**9. What role does parental involvement play in a student’s academic achievement?**

**10. From your experience, how do socio-economic factors such as financial stability, family support, or work commitments affect students’ ability to succeed?**

**4. Closing Questions**

We have reached the end of our discussion.
Is there anything else you would like to add about factors that influence student performance or teaching strategies that could help improve learning outcomes?

Thank you for sharing your valuable insights. Your input will contribute to developing early identification strategies and academic support interventions.

**5. Post-Interview Reflection Template**

| **Field** | **Notes** |
| --- | --- |
| Interview ID |  |
| Participant Role / Teaching Experience |  |
| Date & Mode (In-person / Online) |  |
| Duration |  |
| Researcher’s Immediate Impressions |  |
| Analytical Memos (emerging themes, surprises, patterns) |  |
| Field Notes (non-verbal behaviours, context, interruptions) |  |

**Ethical and Procedural Considerations**

- Informed consent obtained before interview and before recording.
- Participants reminded of voluntary participation and right to withdraw.
- Confidentiality ensured; identifiers removed during transcription.
- Data stored securely with restricted access.
- Researcher maintains reflexivity log (biases, assumptions, positionality).
- Audit trail maintained (guide version, decisions, coding steps).

**Reference**

Kahlke R., O’Brien B.C., & Varpio L. (2025). Qualitative research interviews for health professions education: AMEE Guide No. 185. Medical Teacher. <https://doi.org/10.1080/0142159X.2025.2536697>
